# Supplementary material for: Phycobiliprotein Peptide Extracts from Arthrospira platensis Ameliorate Nonalcoholic Fatty Liver Disease by Modulating Hepatic Lipid Profile and Strengthening Fat Mobilization
Source: MDPI journal article supplement (doi:10.3390/nu15214573), 2023-10-27
Supplement: s1 [file s1]

## Supplementary materials

**Table S1. Specific peptide sequences of *Arthrospira platensis* phycobiliproteins peptide extracts.**

| Peptides sequence |         |           |            |                |
|-------------------|---------|-----------|------------|----------------|
| DERVL             | LDERVL  | LRDLDY    | DPSILDERV  | ADQRGKDKCAR    |
| DYYLR             | LDYYLR  | MFDAFTK   | DSQGRFLSS  | DPSILDERVLN    |
| EARYL             | LRDLDY  | MKTPLTE   | GIDEINRTF  | GDPSILDERVL    |
| GYYL              | MEILR   | NKFPYTT   | IRDLDYLR   | GELDRIKSFVT    |
| LDRIK             | NKFPYT  | RDLDYLL   | IVNADAEAR  | SPGELDRIKSF    |
| LRDME             | RDLDY   | RPDVVSP   | LRDLDYLR   | YLSPGELDRIK    |
| LRLIT             | SYFDRA  | ADAEARYL  | LRDMEILR   | AGDPSILDERVL   |
| LRMVT             | YIEALK  | DMEILRY   | PSILDERVL  | LAGDPSILDERVL  |
| LRVYT             | YLRMVT  | DPSILDER  | RTFELSPSW  | SPGELDRIKSFVT  |
| NKFPY             | DEYLIAG | GIDEINRT  | SLLYSDITR  | YLSPGELDRIKSF  |
| QGRFL             | DLDYYLR | IDEGINRTF | SPGELDRIK  | NYAADQRGKDKCAR |
| RDLDY             | DMEILR  | NKFPYTTQ  | DPSILDERVL |                |
| RTFEL             | DSQGRFL | PGELDRIK  | DQRGKDKCAR |                |
| RYVTY             | EINRTFE | RDLDYLR   | GIDEINRTFE |                |
| SYFDR             | GELDRIK | RDMEILR   | GKYLDASAIQ |                |
| ELDRIK            | GIDEINR | RPDVVSPG  | HGLSGDAAVE |                |
| FDAFTK            | GKDKCAR | SILDERVL  | LSPGELDRIK |                |
| GELDRI            | ILDERVL | SLGVPIGA  | SIVNADAEAR |                |
| GELRVR            | IRDLDY  | SPGELDRI  | SPSWYIEALK |                |
| IRDLDY            | LDERVLN | DERVLNGLK | SQADTRGEML |                |

**Table S2. The primer sequences used in this study.**

| Gene         | Sequence (5' to 3') |                          |
|--------------|---------------------|--------------------------|
| <i>GAPDH</i> | Forward             | GCAAGTTCAACGGCACAG       |
|              | Reverse             | GCCAGTAGACTCCACGACAT     |
| <i>HSL</i>   | Forward             | CTGGAGTTAAGTGGGCGCAAG    |
|              | Reverse             | CAGACACACTCCTGCGCATAGAC  |
| <i>ATGL</i>  | Forward             | TGACTCGAGTTTCGGATGGAGA   |
|              | Reverse             | GAAATGCCGCCATCCACATAG    |
| <i>UCP1</i>  | Forward             | TACCCAGCTGTGCAATGACCA    |
|              | Reverse             | GCACACAAACATGATGACGTTCC  |
| <i>UCP2</i>  | Forward             | GCTGGTGACCTATGACCTCATCAA |
|              | Reverse             | GTACTGGCCCAAGGCAGAGTTC   |

**Table S3. Significantly different components identified by hepatic lipidomics between PPE\_H and HFD groups (VIP value > 2.5, PPE\_H vs HFD).**

| Differential lipids             | Formula           | RT (min) | m/z (Da) | VIP value | P_value |
|---------------------------------|-------------------|----------|----------|-----------|---------|
| <b>CL (24:2/18:0/18:1/22:4)</b> | C91 H162 O17 P2   | 7.495    | 794.5649 | 2.6517    | 0.0045  |
| <b>DLCL (18:1/20:3)</b>         | C47 H85 O15 P2    | 4.886    | 951.5369 | 3.4042    | 0.0026  |
| <b>DLCL (18:2/20:4)</b>         | C47 H81 O15 P2    | 4.047    | 947.5056 | 3.1387    | 0.0307  |
| <b>GM3(d18:1/24:0)</b>          | C65 H119 O21 N2   | 8.578    | 1263.831 | 2.5132    | 0.0248  |
| <b>MLCL (18:2/16:0/18:2)</b>    | C61 H111 O16 P2   | 8.491    | 1161.735 | 5.9458    | 0.0241  |
| <b>PI (18:0/18:2)</b>           | C45 H82 O13 N0 P1 | 6.505    | 861.5499 | 6.2786    | 0.0137  |
| <b>DG (16:0/16:1)</b>           | C35 H70 O5 N1     | 7.769    | 584.5249 | 2.8386    | 0.0079  |
| <b>PE (18:1p/22:4)</b>          | C45 H81 O7 N1 P1  | 7.748    | 778.5745 | 3.4867    | 0.0157  |
| <b>TG (16:0/14:0/14:0)</b>      | C47 H94 O6 N1     | 12.536   | 768.7076 | 3.0579    | 0.0320  |
| <b>TG (15:0/14:0/16:1)</b>      | C48 H94 O6 N1     | 12.205   | 780.7076 | 3.1611    | 0.0268  |
| <b>TG (16:0/14:0/16:1)</b>      | C49 H92 O6 Na1    | 12.509   | 799.6786 | 3.2059    | 0.01456 |
| <b>TG (16:0/16:1/18:2)</b>      | C53 H100 O6 N1    | 12.213   | 846.7545 | 2.6953    | 0.03468 |
| <b>TG (19:1/18:1/18:1)</b>      | C58 H110 O6 N1    | 12.631   | 916.8328 | 2.6259    | 0.03612 |

**Table S4. Significantly different components identified by hepatic lipidomics between HFD and Chow groups (VIP value > 2.5, HFD vs Chow).**

| <b>Differential lipids</b>      | <b>Formula</b>   | <b>RT (min)</b> | <b>m/z (Da)</b> | <b>VIP value</b> | <b>p-value</b> |
|---------------------------------|------------------|-----------------|-----------------|------------------|----------------|
| <b>CL (18:2/18:2/18:2/22:6)</b> | C85 H141 O17 P2  | 11.008          | 1495.9650       | 3.1670           | 0.0361         |
| <b>LPG (16:1)</b>               | C22 H42 O9 N0 P1 | 1.025           | 481.25720       | 2.6408           | 0.0002         |
| <b>LPMc (18:1)</b>              | C22 H42 O7 N0 P1 | 1.824           | 449.26737       | 3.5592           | 0.0183         |
| <b>PE (16:1e/20:5)</b>          | C41 H71 O7 N1 P1 | 6.471           | 720.49737       | 2.6292           | 0.0001         |
| <b>CL (18:2/20:3/16:0/20:4)</b> | C83 H145 O17 P2  | 11.398          | 1475.9952       | 3.2828           | 0.0047         |
| <b>PE (16:0/16:1)</b>           | C37 H73 O8 N1 P1 | 6.501           | 690.5068        | 4.0537           | 0.0005         |
| <b>TG (22:4/11:1/18:2)</b>      | C60 H106 O6 N2   | 12.526          | 950.8045        | 2.5041           | 0.0002         |
| <b>TG (20:1/18:1/22:5)</b>      | C63 H112 O6 N1   | 13.858          | 978.84841       | 2.5874           | 7.9E-06        |
| <b>TG (22:4/20:4/22:5)</b>      | C67 H108 O6 N1   | 12.314          | 1022.8171       | 4.4580           | 3.2E-09        |

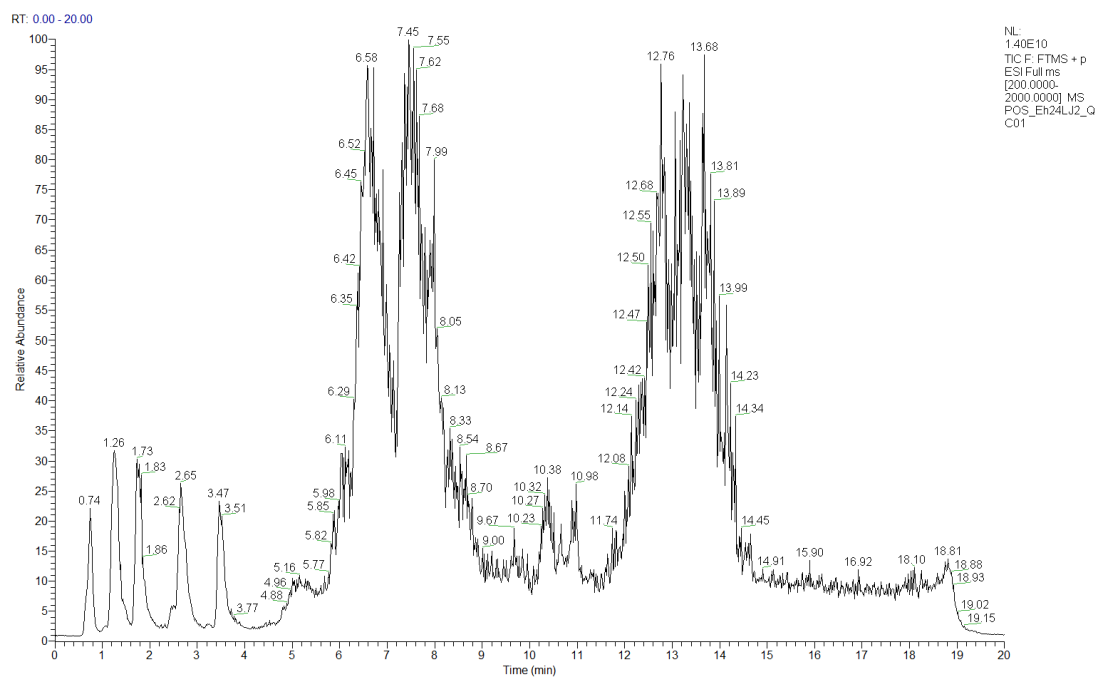

**Figure S1. The total ion chromatogram of hepatic lipidomics by LC-MS analysis in positive ion mode.**

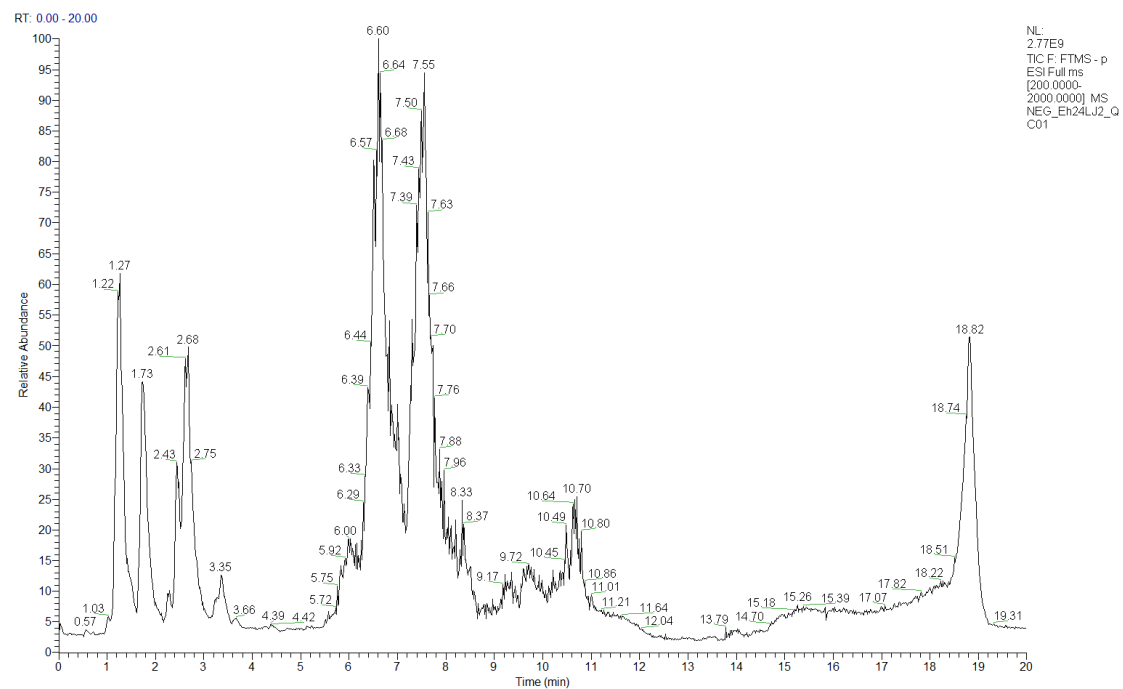

**Figure S2. The total ion chromatogram of hepatic lipidomics by LC-MS analysis in negative ion mode.**
